# Supplementary material
Source: Springer Nature journal article supplement (https://www.springermedizin.de/resource/supplementary/12955_2012_939_MOESM2_ESM.pdf/9558856)
Supplement: MOESM2 [file 9558856]

N=156,582 total unique NHWS  
respondents  
(January 2009 to March 2011)

n=26,298 reported a diagnosis of  
depression

n=130,284 did not report a  
diagnosis of depression

n=22,822 did not report a of  
schizophrenia or a diagnosis of  
bipolar disorder

n=3,476 reported a diagnosis of  
schizophrenia or bipolar disorder

n=469 were using both an  
antidepressant and an atypical  
antipsychotic medication

n=22,353 were not using both an  
antidepressant and an atypical  
antipsychotic medication

n=459 reported using all their  
depression medications for at least  
2 months

n=10 reported using at least one of  
their depression medications for  
less than 2 months

n=426 reported  
complete data for all study  
covariates

n=33 reported missing data on  
study covariates
